# Supplementary material for: Synthesis and Thermo-Responsive Behavior of Poly(N-isopropylacrylamide)-b-Poly(N-vinylisobutyramide) Diblock Copolymer
Source: MDPI journal article supplement (doi:10.3390/polym16060830), 2024-03-18
Supplement: s1 [file s1]

## Supplementary Materials

# Synthesis and Thermo-responsive Behavior of Poly(*N*-isopropylacrylamide)-*b*-Poly(*N*-vinylisobutyramide) Diblock Copolymer

Jun Hyok Yoon<sup>1</sup>, Taehyoung Kim<sup>1</sup>, and Myungeun Seo<sup>1,2</sup>, and Sang Youl Kim<sup>1\*</sup>

<sup>1</sup> Department of Chemistry, KAIST, Daejeon 34141, Republic of Korea

<sup>2</sup> KAIST Institute for Nanocentry, KAIST, Daejeon, 34141, Republic of Korea

\* Correspondence: kimsy@kaist.ac.kr; Tel.: +82-42-350-2834

## Supplementary Figures

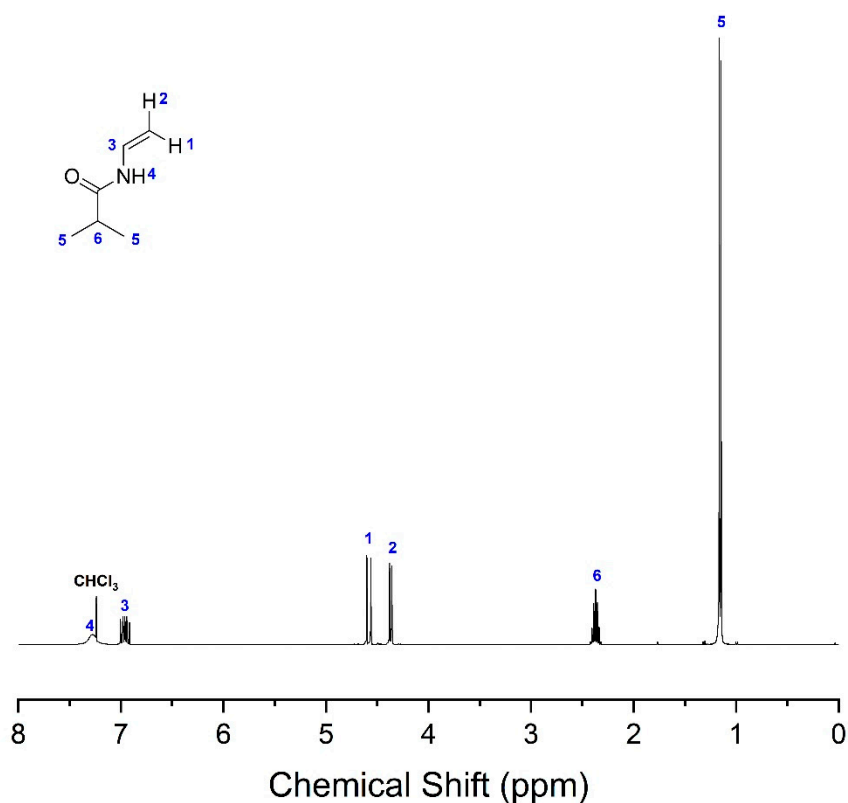

**Figure S1.** <sup>1</sup>H NMR spectrum of synthesized *N*-vinylisobutyramide monomer (400 MHz, CDCl<sub>3</sub>).

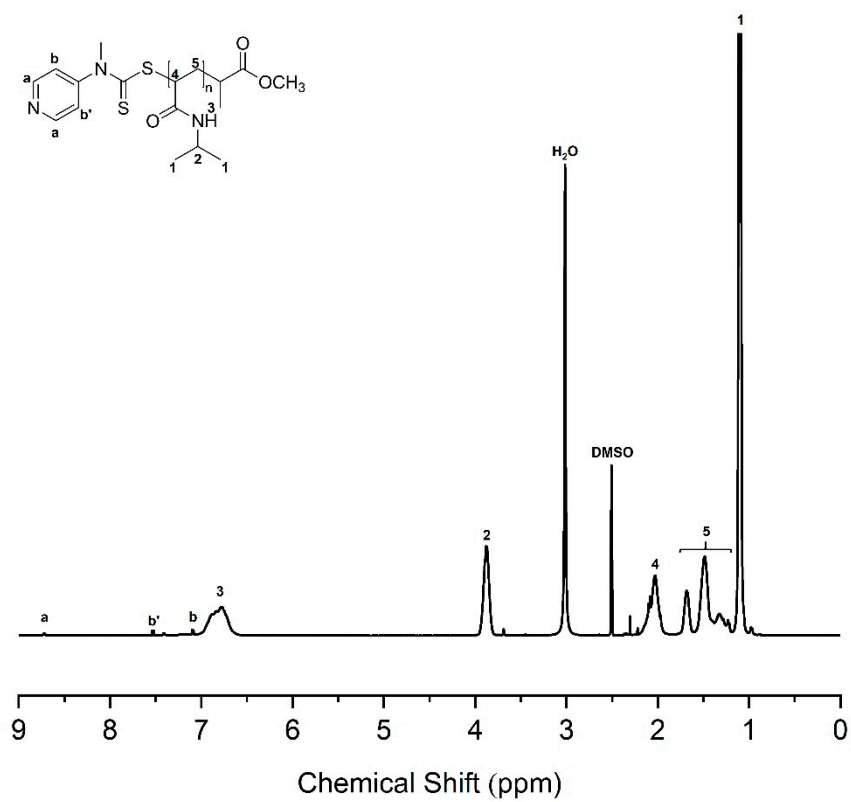

**Figure S2.**  $^1\text{H}$  NMR spectrum of PNIPAM<sub>258</sub> macro-RAFT agent (400 MHz, DMSO-*d*<sub>6</sub>, 100 °C). Integration ratio of 1H of **a** : 1H of **2** = 2 : 258.

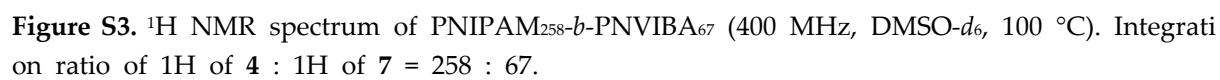

**Figure S3.**  $^1\text{H}$  NMR spectrum of PNIPAM<sub>258</sub>-*b*-PNVIBA<sub>67</sub> (400 MHz, DMSO-*d*<sub>6</sub>, 100 °C). Integration ratio of 1H of **4** : 1H of **7** = 258 : 67.

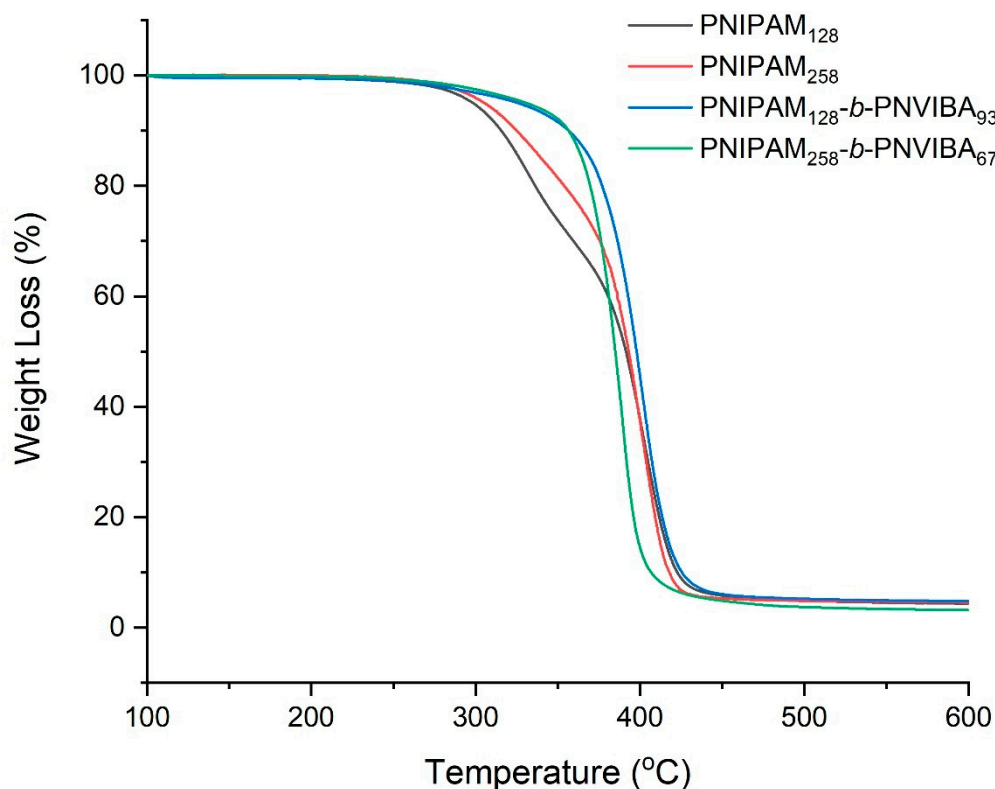

**Figure S4.** Thermogravimetric Analysis (TGA) of PNIPAM macro-RAFT agent and PNIPAM-*b*-PNVIBA diblock copolymers. Heating rate : 10 °C/min, temperature range : 100 to 600 °C under N<sub>2</sub> condition. 5% decomposition temperature (5% weight loss temperature,  $T_{d5}$ ) was identified. PNIPAM<sub>128</sub> macro-RAFT agent  $T_{d5}$  = 298.5 °C, PNIPAM<sub>258</sub> macro-RAFT agent  $T_{d5}$  = 316.4 °C, PNIPAM<sub>128</sub>-*b*-PNVIBA<sub>93</sub>  $T_{d5}$  = 325.8 °C, PNIPAM<sub>258</sub>-*b*-PNVIBA<sub>67</sub>  $T_{d5}$  = 330.5 °C.

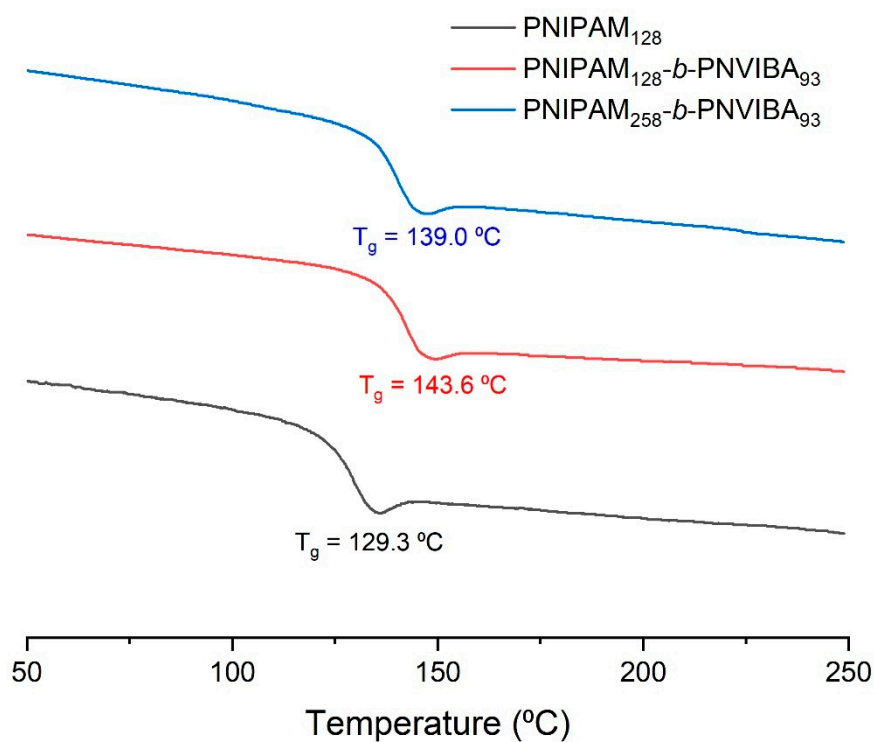

**Figure S5.** Differential Scanning Calorimetry measurement (DSC) of PNIPAM macro-RAFT agent and PNIPAM-*b*-PNVIBA diblock copolymers. Heating rate : 10 °C/min, and temperature range : -10 to 250 °C under N<sub>2</sub> condition. The data were obtained during the second heating cycle. Glass transition temperature ( $T_g$ ) of PNIPAM<sub>128</sub> macro-RAFT agent is 129.3 °C,  $T_g$  of PNIPAM<sub>128</sub>-*b*-PNVIBA<sub>93</sub> is 143.6 °C, and  $T_g$  of PNIPAM<sub>128</sub>-*b*-PNVIBA<sub>93</sub> is 139.0 °C.

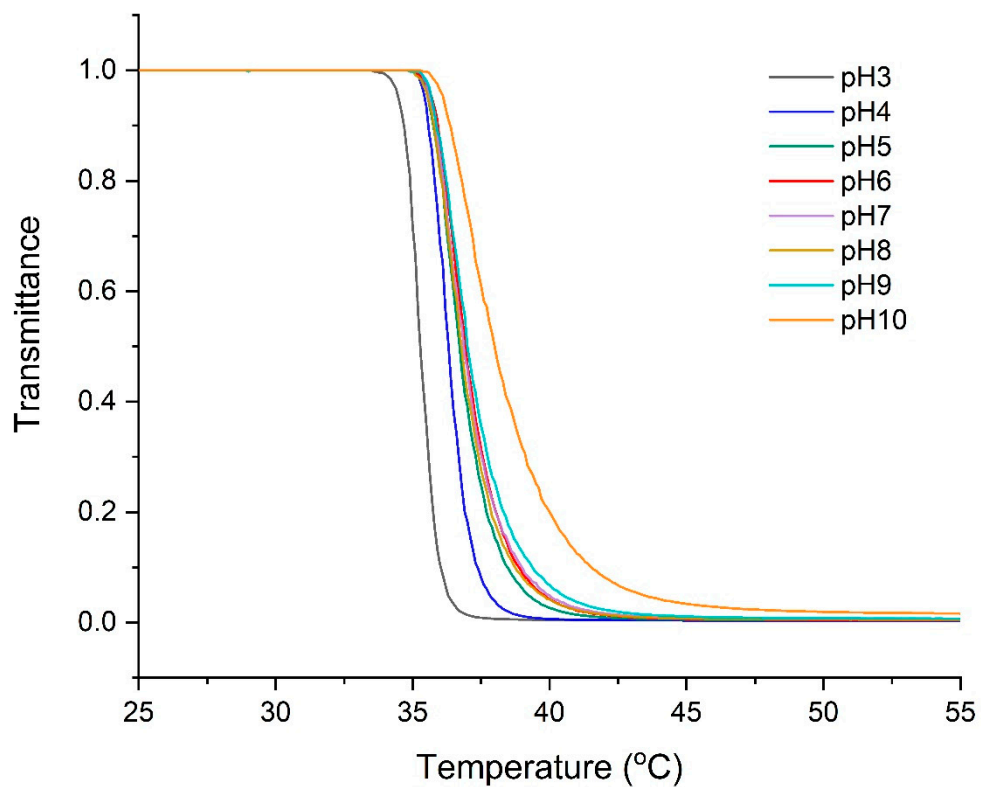

**Figure S6.** Temperature-dependent change of transmittance to determine thermo-responsive character of PNIPAM<sub>128</sub>-*b*-PNVIBA<sub>93</sub> with changing pH. Range of pH : 3-10. Heating rate: 0.1 °C/min. Cloud point (CP) is the temperature when transmittance becomes 0.5. CP of each samples : CP<sub>pH3</sub> = 36.3 °C, CP<sub>pH4</sub> = 36.3 °C, CP<sub>pH5</sub> = 36.7 °C, CP<sub>pH6</sub> = 36.9 °C, CP<sub>pH7</sub> = 36.9 °C, CP<sub>pH8</sub> = 36.9 °C, CP<sub>pH9</sub> = 37.0 °C, CP<sub>pH10</sub> = 37.8 °C

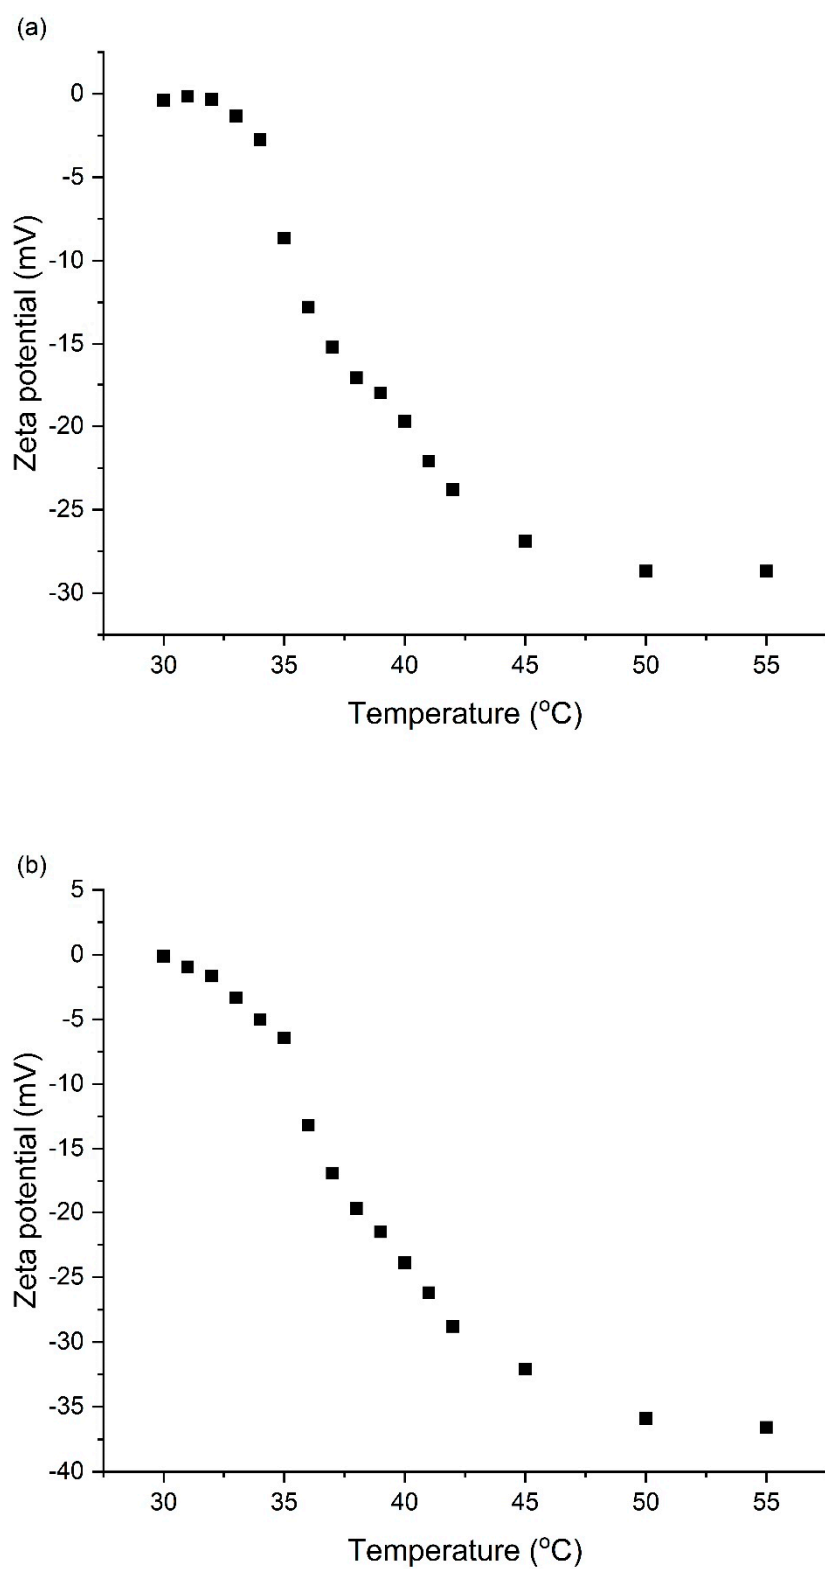

**Figure S7.** Temperature dependence of the zeta potential for PNIPAM-*b*-PNVIBA polymer solutions. (a) PNIPAM<sub>128</sub>-*b*-PNVIBA<sub>93</sub> solution, (b) PNIPAM<sub>258</sub>-*b*-PNVIBA<sub>67</sub> solution. Polymer concentration : 0.5 mg/mL

## Supplementary Tables

**Table S1.** Variable temperature DLS analysis results of PNIPAM<sub>128</sub> macor-RAFT agent

| Temperature | Eff. Diam. (nm) | Polydispersity | Baseline Index | Count Rate (kcps) | Diffusion Coeff. (cm <sup>2</sup> /s) |
|-------------|-----------------|----------------|----------------|-------------------|---------------------------------------|
| 25.0 °C     | 6.51            | 0.274          | 0.0            | 6.4               | 7.543E-07                             |
| 26.0 °C     | 7.23            | 0.020          | 0.0            | 6.4               | 6.960E-07                             |
| 27.0 °C     | 4.95            | 0.345          | 0.0            | 6.4               | 1.044E-06                             |
| 28.0 °C     | 5.40            | 0.337          | 0.0            | 6.5               | 9.814E-07                             |
| 29.0 °C     | 9.32            | 0.308          | 2.8            | 6.6               | 5.829E-07                             |
| 30.0 °C     | 9.32            | 0.316          | 0.0            | 7.0               | 5.969E-07                             |
| 31.0 °C     | 9.16            | 0.351          | 0.0            | 7.2               | 6.230E-07                             |
| 32.0 °C     | 11.68           | 0.354          | 0.0            | 7.6               | 5.001E-07                             |
| 33.0 °C     | 40.93           | 0.363          | 0.0            | 8.9               | 1.463E-07                             |
| 34.0 °C     | 83.77           | 0.351          | 0.0            | 15.1              | 7.318E-08                             |
| 35.0 °C     | 163.31          | 0.166          | 0.0            | 181.9             | 3.844E-08                             |
| 36.0 °C     | 284.14          | 0.052          | 0.0            | 1,693.7           | 2.261E-08                             |
| 37.0 °C     | 418.45          | 0.139          | 0.0            | 542.9             | 1.569E-08                             |
| 38.0 °C     | 494.92          | 0.126          | 3.4            | 500.0             | 1.358E-08                             |
| 39.0 °C     | 493.14          | 0.184          | 9.1            | 453.3             | 1.394E-08                             |
| 40.0 °C     | 474.28          | 0.117          | 9.1            | 460.6             | 1.481E-08                             |
| 41.0 °C     | 497.88          | 0.056          | 9.9            | 476.8             | 1.442E-08                             |
| 42.0 °C     | 491.51          | 0.123          | 8.5            | 491.0             | 1.493E-08                             |
| 43.0 °C     | 522.80          | 0.414          | 8.3            | 499.3             | 1.433E-08                             |
| 44.0 °C     | 485.26          | 0.011          | 6.7            | 482.9             | 1.577E-08                             |
| 45.0 °C     | 536.37          | 0.534          | 9.2            | 483.5             | 1.458E-08                             |
| 46.0 °C     | 521.76          | 0.296          | 9.7            | 485.2             | 1.529E-08                             |
| 47.0 °C     | 547.19          | 0.529          | 9.0            | 485.6             | 1.488E-08                             |
| 48.0 °C     | 536.54          | 0.535          | 7.9            | 485.4             | 1.549E-08                             |
| 49.0 °C     | 546.36          | 0.475          | 8.1            | 479.5             | 1.554E-08                             |
| 50.0 °C     | 551.34          | 0.516          | 9.9            | 479.7             | 1.570E-08                             |
| 51.0 °C     | 563.87          | 0.634          | 9.1            | 478.3             | 1.565E-08                             |
| 52.0 °C     | 548.57          | 0.598          | 7.8            | 470.1             | 1.641E-08                             |
| 53.0 °C     | 537.65          | 0.352          | 8.8            | 466.6             | 1.709E-08                             |
| 54.0 °C     | 546.51          | 0.441          | 9.0            | 466.0             | 1.713E-08                             |
| 55.0 °C     | 551.79          | 0.457          | 9.2            | 460.9             | 1.729E-08                             |



**Table S2.** Variable temperature DLS analysis results of PNIPAM<sub>128</sub>-*b*-PNVIBA<sub>93</sub> diblock copolymer

| Sample ID | Eff. Diam. (nm) | Polydispersity | Baseline Index | Count Rate (kcps) | Diffusion Coeff. (cm <sup>2</sup> /s) |
|-----------|-----------------|----------------|----------------|-------------------|---------------------------------------|
| 25.0 °C   | 18.23           | 0.328          | 0.0            | 9.4               | 2.760E-07                             |
| 26.0 °C   | 22.43           | 0.355          | 0.0            | 9.4               | 2.243E-07                             |
| 27.0 °C   | 26.04           | 0.351          | 0.0            | 9.6               | 1.985E-07                             |
| 28.0 °C   | 26.72           | 0.319          | 0.0            | 9.5               | 2.187E-07                             |
| 29.0 °C   | 24.08           | 0.339          | 0.0            | 9.9               | 2.255E-07                             |
| 30.0 °C   | 26.97           | 0.337          | 0.0            | 9.6               | 2.382E-07                             |
| 31.0 °C   | 26.72           | 0.319          | 0.0            | 9.4               | 2.187E-07                             |
| 32.0 °C   | 21.35           | 0.353          | 0.0            | 9.6               | 2.871E-07                             |
| 33.0 °C   | 25.22           | 0.357          | 0.0            | 9.4               | 2.374E-07                             |
| 34.0 °C   | 32.09           | 0.337          | 0.0            | 10.2              | 1.956E-07                             |
| 35.0 °C   | 44.09           | 0.325          | 0.0            | 10.5              | 1.262E-07                             |
| 36.0 °C   | 53.63           | 0.337          | 0.0            | 12.4              | 1.038E-07                             |
| 37.0 °C   | 160.90          | 0.121          | 0.0            | 133.2             | 4.081E-08                             |
| 38.0 °C   | 294.89          | 0.122          | 0.0            | 944.1             | 2.280E-08                             |
| 39.0 °C   | 343.25          | 0.111          | 5.7            | 596.7             | 2.003E-08                             |
| 40.0 °C   | 378.61          | 0.186          | 8.8            | 613.4             | 1.855E-08                             |
| 41.0 °C   | 379.21          | 0.115          | 9.9            | 540.3             | 1.893E-08                             |
| 42.0 °C   | 353.27          | 0.142          | 8.6            | 561.7             | 2.078E-08                             |
| 43.0 °C   | 321.94          | 0.143          | 8.8            | 527.8             | 2.328E-08                             |
| 44.0 °C   | 292.07          | 0.176          | 8.4            | 522.4             | 2.621E-08                             |
| 45.0 °C   | 277.95          | 0.058          | 9.4            | 507.2             | 2.813E-08                             |
| 46.0 °C   | 266.65          | 0.034          | 8.4            | 507.8             | 2.992E-08                             |
| 47.0 °C   | 257.89          | 0.008          | 9.8            | 506.1             | 3.157E-08                             |
| 48.0 °C   | 251.00          | 0.037          | 9.3            | 490.0             | 3.312E-08                             |
| 49.0 °C   | 245.49          | 0.056          | 9.6            | 490.6             | 3.457E-08                             |
| 50.0 °C   | 244.27          | 0.094          | 8.8            | 472.0             | 3.543E-08                             |
| 51.0 °C   | 233.10          | 0.055          | 8.9            | 470.9             | 3.787E-08                             |
| 52.0 °C   | 234.47          | 0.079          | 9.4            | 468.1             | 3.840E-08                             |
| 53.0 °C   | 235.83          | 0.102          | 9.5            | 471.4             | 3.896E-08                             |
| 54.0 °C   | 236.67          | 0.151          | 9.7            | 472.4             | 3.955E-08                             |
| 55.0 °C   | 236.21          | 0.182          | 9.4            | 473.7             | 4.038E-08                             |
